# Supplementary material for: Formation of Metallic Ag on AgBr by Femtosecond Laser Irradiation
Source: MDPI journal article supplement (doi:10.3390/physchem2020013), 2022-06-01
Supplement: s1 [file s1]

## Supplementary Material for “Formation of metallic Ag on AgBr by femtosecond laser irradiation”

L. Cabral<sup>a</sup>, Juan Andrés<sup>b,#</sup>, Elson Longo<sup>c</sup>, Miguel A. San-Miguel<sup>d</sup>, E. Z. da Silva<sup>a,\*</sup>

<sup>a</sup>Institute of Physics “Gleb Wataghin” (IFGW), State University of Campinas, 13083-859 Campinas, SP, Brazil

<sup>b</sup>Department of Inorganic and Organic Chemistry, University Jaume I (UJI), Castelló 12071, Spain

<sup>c</sup>LIEC-CDMF, Department of Chemistry, Federal University of São Carlos, 13565-905 São Carlos, SP, Brazil

<sup>d</sup>Institute of Chemistry, State University of Campinas, 13083-970 Campinas, SP, Brazil

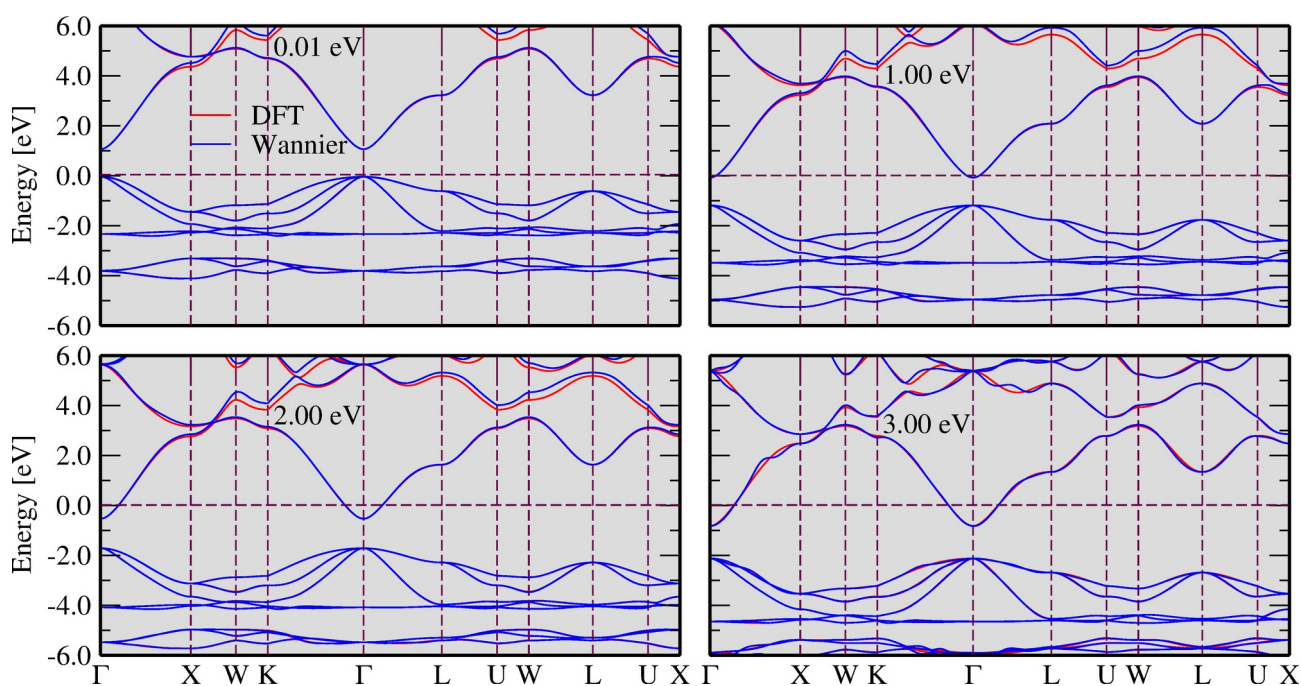

**Figure S1.** Calculated electronic band structure for AgBr as a function of the electronic temperature using finite-temperature density functional theory and Wannier interpolation.

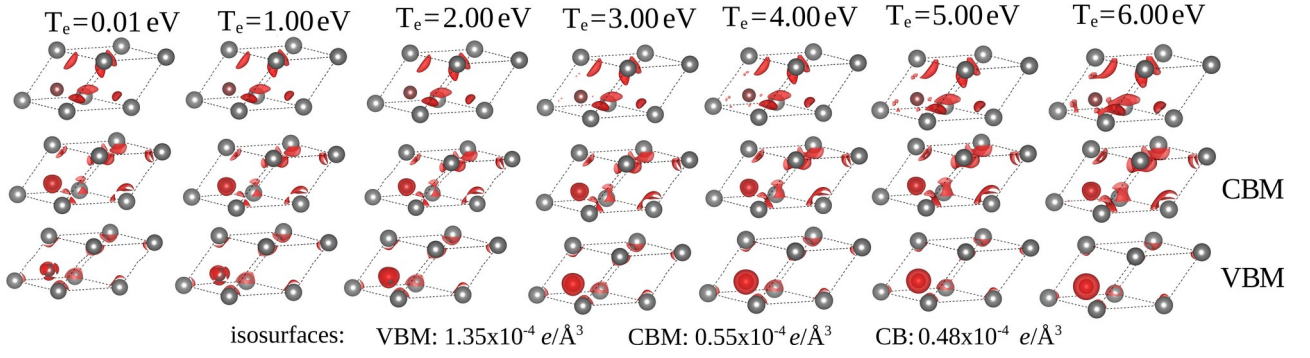

**Figure S2.** Calculated charge density for AgBr in the primitive unitcell for the valence band maximum (VBM), conduction band minimum (CBM) and conduction band (CB) as a function of the electronic temperature.

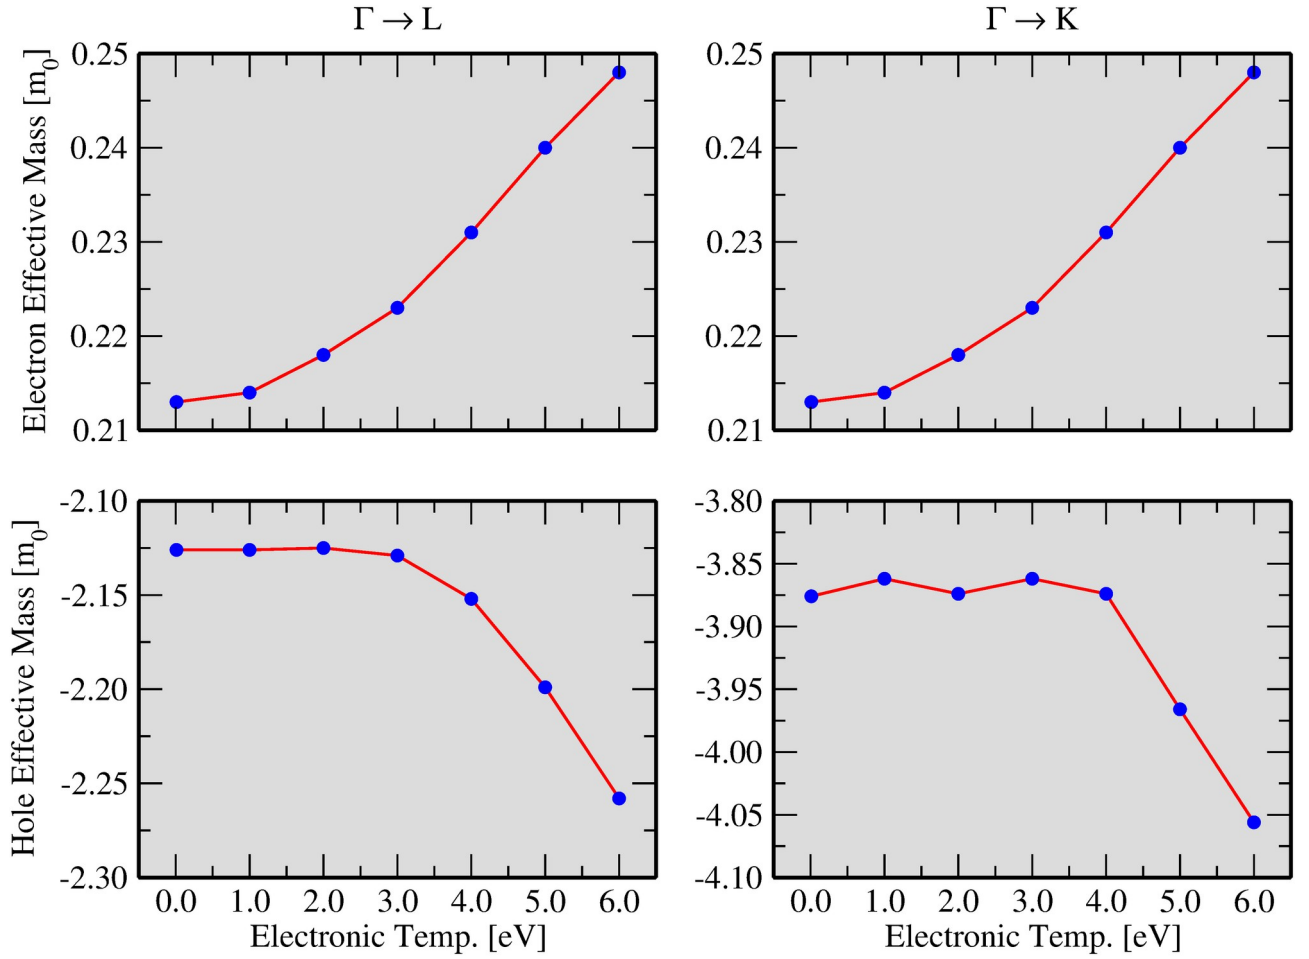

**Figure S3.** Electron and hole effective mass dependency of the Brillouin zone k-path used in the band structure calculations of Figure 1 and Figure S1.

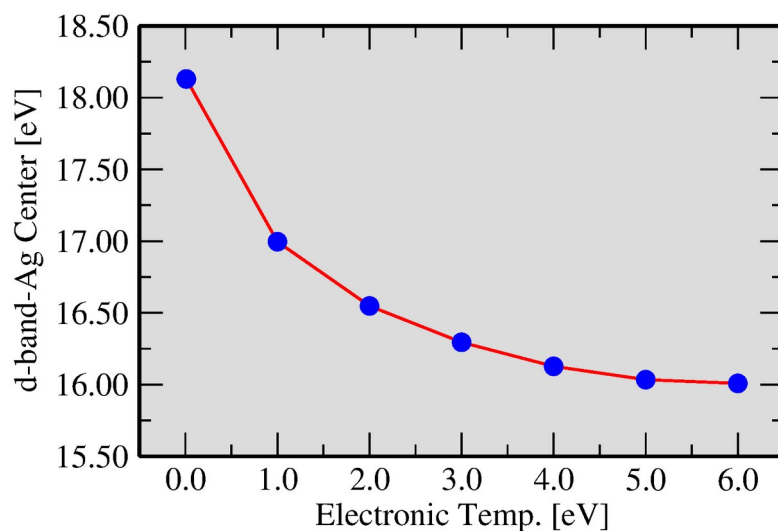

**Figure S4.** Finite temperature-density functional theory calculations for the d-band Ag center. The electronic excitation changes the d-Ag band center.

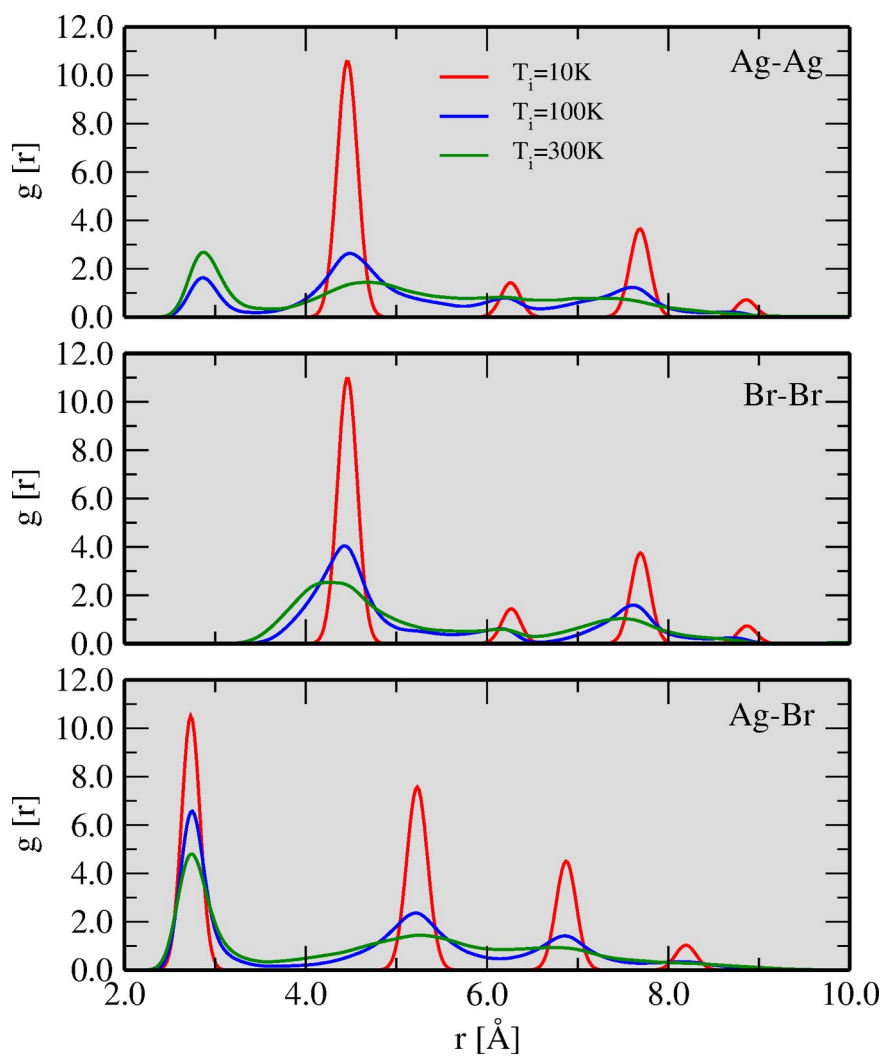

**Figure S5.** Radial distribution function calculated at 2.00 eV as a function of the lattice temperature at 10 K (red), 100 K (blue) and 300 K (green). The top, center and bottom panels denote the RDF for Ag-Ag, Br-Br and Ag-Br atoms, respectively.
